# Supplementary material for: A solid-state route to stabilize cubic Li7La3Zr2O12 at low temperature for all-solid-state-battery applications
Source: Royal Society of Chemistry journal article supplement (doi:10.1039/d0cc04437g), 2020-01-01
Supplement: d0cc04437g1.pdf [file d0cc04437g1.pdf]

Electronic Supplementary Information

for

**A solid-state route to stabilize cubic  $\text{Li}_7\text{La}_3\text{Zr}_2\text{O}_{12}$  at low temperature for all-solid-state-battery applications**

Joah Han<sup>a</sup> and Jae Chul Kim<sup>\*a</sup>

<sup>a</sup>Department of Chemical Engineering and Materials Science, Stevens Institute of Technology,  
1 Castle Point Terrace, Hoboken, NJ 07030, USA

Corresponding author: Tel: +1-201-216-5286, E-mail: [jkim7@stevens.edu](mailto:jkim7@stevens.edu)

## Methods

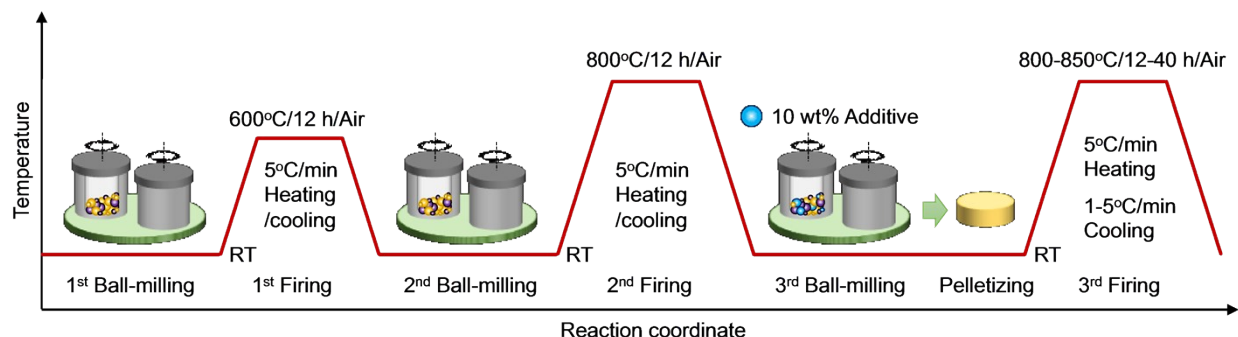

**Figure S1.** Schematic illustration of the LLZO preparation procedure in this work.

**Preparation of  $\text{Li}_7\text{La}_3\text{Zr}_2\text{O}_{12}$  (LLZO):** The synthesis procedure of LLZO and Al-doped LLZO (Al-LLZO) is illustrated in Figure S1. We used a solid-state route consisting of three high-energy ball-milling steps and three firing stages. The 10 wt% excess amount of  $\text{Li}_2\text{CO}_3$  ( $\geq 99\%$ , Sigma Aldrich) and the stoichiometric amount of  $\text{La}_2\text{O}_3$  (99.99%, Sigma Aldrich) and  $\text{ZrO}_2$  (99%, Sigma Aldrich) were dispersed in acetone (99%, Alfa Aesar) and mixed using a planetary ball-mill (Retsch, PM200) at 300 or 450 rpm for 9 h. The excess amount of Li was to compensate Li evaporation during heat treatment. As-received  $\text{La}_2\text{O}_3$  was heated at 900°C for 12 h before use. For Al-LLZO, 2.4 at%  $\text{Al}_2\text{O}_3$  (99.99%, Sigma Aldrich) was added to the precursor mixture. After drying, the mixture was heated up at a 5°C/min rate, fired at 600°C for 12 h in air, and cooled down to room temperature at a 5°C/min rate. The powder samples were ball-milled again using the same setup at 300 or 450 rpm for 6 h and fired at 800°C for 12 h in air using the same heating and cooling rates as the first firing. To promote densification, 10 wt%  $\text{Li}_3\text{BO}_3$ ,  $\text{Li}_3\text{PO}_4$ , or  $\text{AlPO}_4$  were added to the product as a sintering aid after the second firing and ball-milled together at 450 rpm for 6 h. Disc-shaped pellets (6 mm diameter, 0.5 – 1 mm thickness) were formed by a hydraulic press (Carver). With 5°C/min heating, the pelletized samples were sintered at 800°C or 850°C for 12 h or 40 h in air and cooled down to room temperature (RT) at a 5°C/min or 1°C/min rate.  $\text{Li}_3\text{BO}_3$  was prepared in-house, and the synthesis method can be found elsewhere.<sup>1</sup>  $\text{Li}_3\text{PO}_4$  and  $\text{AlPO}_4$  were used as received (Sigma-Aldrich).

**Characterization:** X-ray diffraction (XRD, Rigaku Ultima IV and Bruker D8 Discover) with  $\text{Cu K}\alpha$  radiation was used to analyze the phase composition of materials. The symmetry, lattice

parameter, and microstrain of synthesized LLZO were identified using a HighscorePlus software. Field-emission scanning electron microscopy (FE-SEM, Zeiss Auriga) and high-resolution transmission electron microscopy (HR-TEM, FEI Tecnai G2 spirit TWIN) were used to reveal particle morphologies. Electrochemical impedance spectroscopy (EIS) was used to estimate ionic conductivity of Al-LLZO. Silver as a blocking electrode was pasted onto both sides of as-sintered Al-LLZO pellets. Using a spring-loaded, customized Swagelok cell or a noise-shielding sample holder (Biologic, CESH), AC impedance was measured on a frequency response analyzer (Biologic SP-300) in a frequency range 7 MHz – 100 mHz (10 mV AC amplitude). For a variable temperature test, a dedicated thermoelectric temperature chamber (Biologic ITS) was used. The activation barrier ( $E_a$ ) for Li conductivity was estimated by plotting the Arrhenius-type equation:  $\sigma T = A \exp(-E_a/k_B T)$ , where  $\sigma$  is the total ionic conductivity measured by EIS,  $A$  is conductivity pre-factor,  $k_B$  is the Boltzmann constant, and  $T$  is temperature. Obtained EIS data were fitted using a ZView software. A custom Swagelok union made of polytetrafluoroethylene with spring-loaded stainless-steel current collectors was used to assemble a Li symmetric cell. We used a 10 wt%  $\text{Li}_3\text{BO}_3$ -added LLZO pellet fired at 850°C for 40 h with 1°C/min cooling (4.97 mm diameter, 1.12 mm thickness) sandwiched in between two Li metal foils (4.76 mm diameter, 100  $\mu\text{m}$  thickness) using a hydraulic press. Cu foils (6 mm diameter, 10  $\mu\text{m}$  thickness) were used as a current collector. The cell was cycled galvanostatically at  $\pm 0.05 \text{ mA/cm}^2$  on a potentiostat (Biologic SP-300). The current polarity was switched every 20 min. The critical current density (CCD) was tested by applying various current densities from 2  $\mu\text{A/cm}^2$  to 5  $\text{mA/cm}^2$  through the Li symmetric cell.

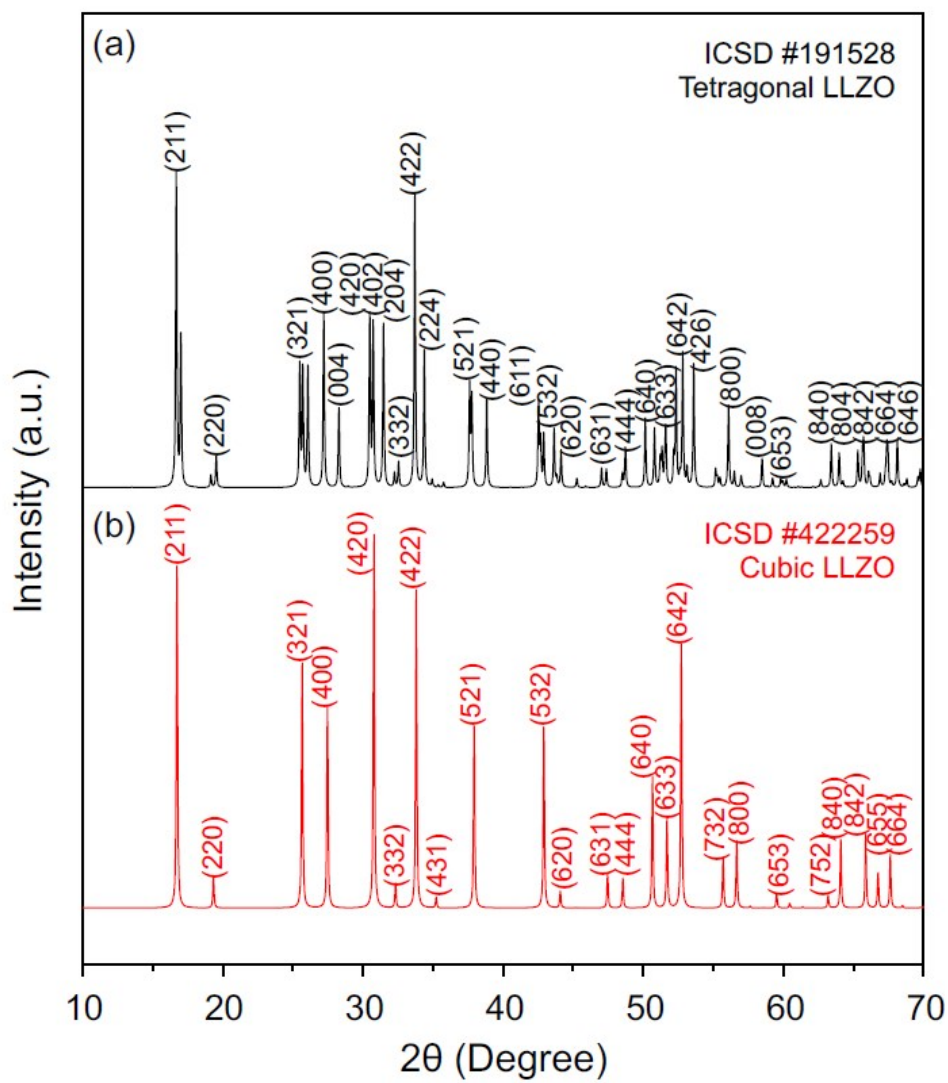

**Figure S2.** XRD patterns with indexing the planes of (a) tetragonal and (b) cubic phase LLZO.

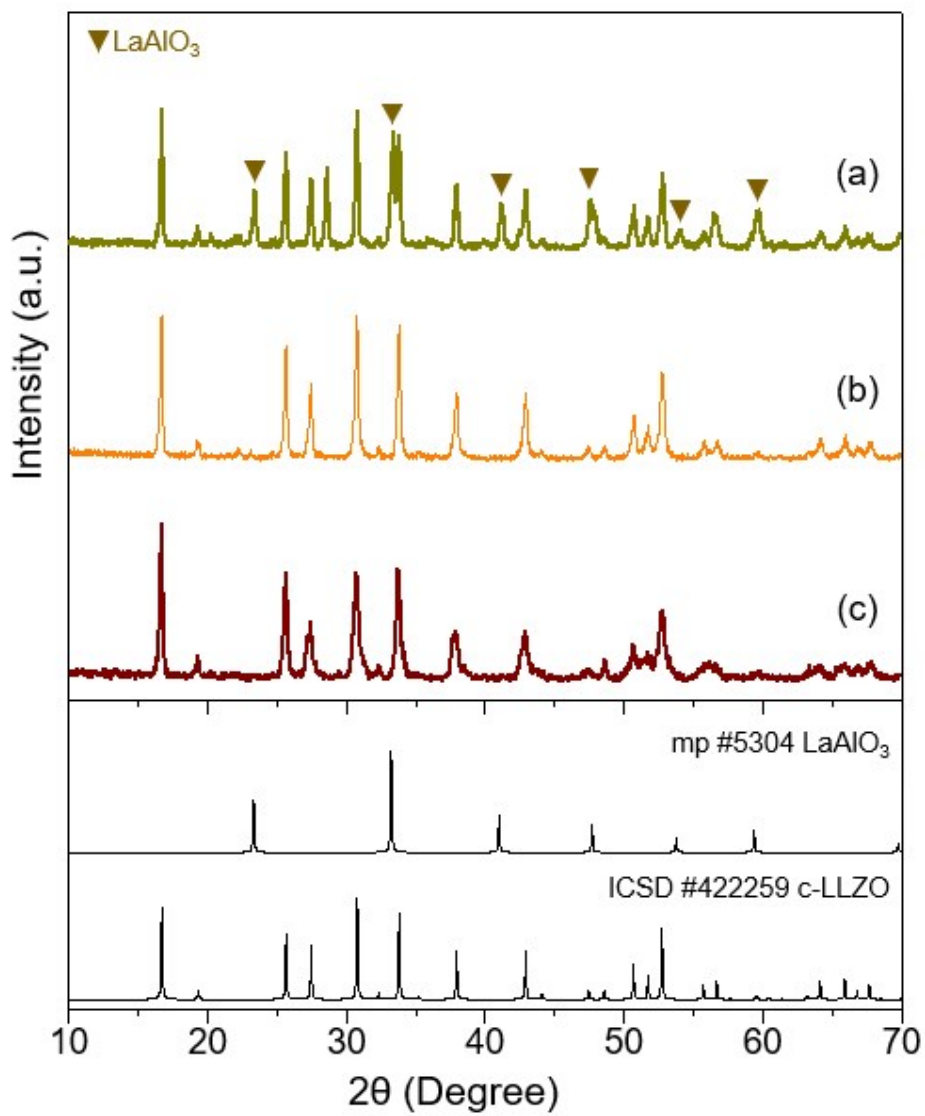

**Figure S3.** XRD patterns of Al-doped LLZO with (a)  $\text{AlPO}_4$  10 wt%, (b)  $\text{Li}_3\text{PO}_4$  10 wt% and (c)  $\text{Li}_3\text{BO}_3$  10 wt% obtained by first and second heat treatment at 600°C and 800°C for 12 h and subsequently heat treated at 800°C for 12 h at high cooling rate (5°C/min)

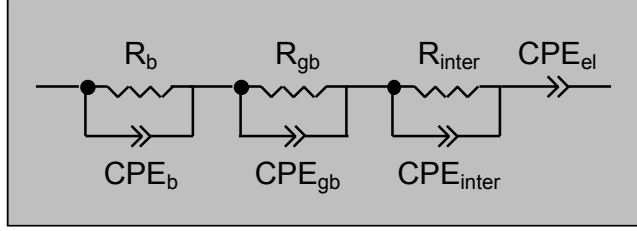

**Figure S4.** Equivalent circuit to model impedance of bulk (b), grain boundary (gb), and interphase (inter).

**Table S1.** Summary of electrochemical impedance spectroscopy results: bulk, grain boundary, and interphase resistances and bulk and total Li conductivities of B-Al-LLZO sintered at various conditions.

| Sintering conditions<br>(Temperature-Time-Cooling rate) | $R_{\text{bulk}}$<br>( $\Omega$ ) | $R_{\text{grain boundary}}$<br>( $\Omega$ ) | $R_{\text{interphase}}$<br>( $\Omega$ ) | $\sigma_{\text{bulk}}$<br>(S/cm) | $\sigma_{\text{total}}$<br>(S/cm) |
|---------------------------------------------------------|-----------------------------------|---------------------------------------------|-----------------------------------------|----------------------------------|-----------------------------------|
| 800°C-12h-5°C/min                                       | 3596                              | 23963                                       | 1516                                    | $9.8 \times 10^{-5}$             | $1.2 \times 10^{-5}$              |
| 800°C-40h-5°C/min                                       | 3188                              | 17960                                       | 1488                                    | $1.9 \times 10^{-4}$             | $2.6 \times 10^{-5}$              |
| 800°C-40h-1°C/min                                       | 1039                              | 1844                                        | 570                                     | $3.4 \times 10^{-4}$             | $1.0 \times 10^{-4}$              |
| 850°C-40h-1°C/min                                       | 1012                              | 1213                                        | 425                                     | $3.6 \times 10^{-4}$             | $1.4 \times 10^{-4}$              |

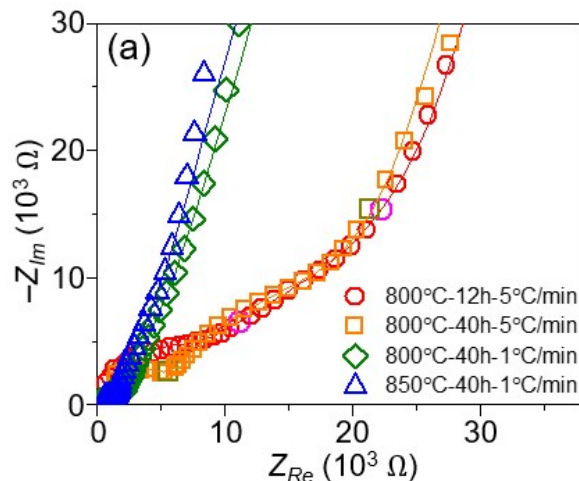

**Figure S5.** A Nyquist plot of the B-Al-LLZO samples with different heating conditions. EIS was measured in 7 MHz – 3 kHz at room temperature.

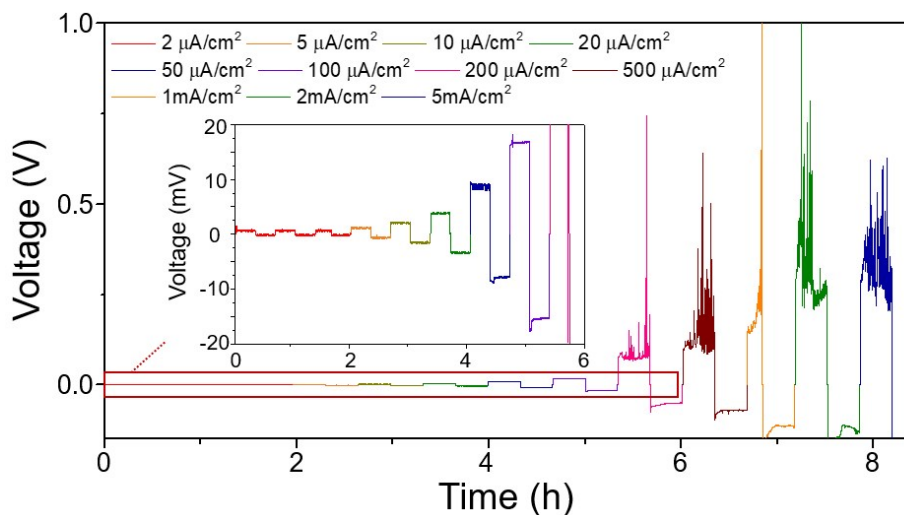

**Figure S6.** The voltage polarization profile of the Li symmetric cell of B-Al-LLZO sintered at 850°C for 40 h with 1°C/min cooling at room temperature as a function of applied current density ranging from 2  $\mu\text{A}/\text{cm}^2$  to 5  $\text{mA}/\text{cm}^2$ .

## Reference

1. M. Tatsumisago, R. Takano, M. Nose, K. Nagao, A. Kato, A. Sakuda, K. Tadanaga and A. Hayashi, *J. Ceram. Soc. Jpn.*, 2017, **125**, 433-437.
